# Supplementary material
Source: PubMed Central journal article supplement (PMC7657993)
Supplement: NIHMS1630769-supplement-1.pdf [file NIHMS1630769-supplement-1.pdf]

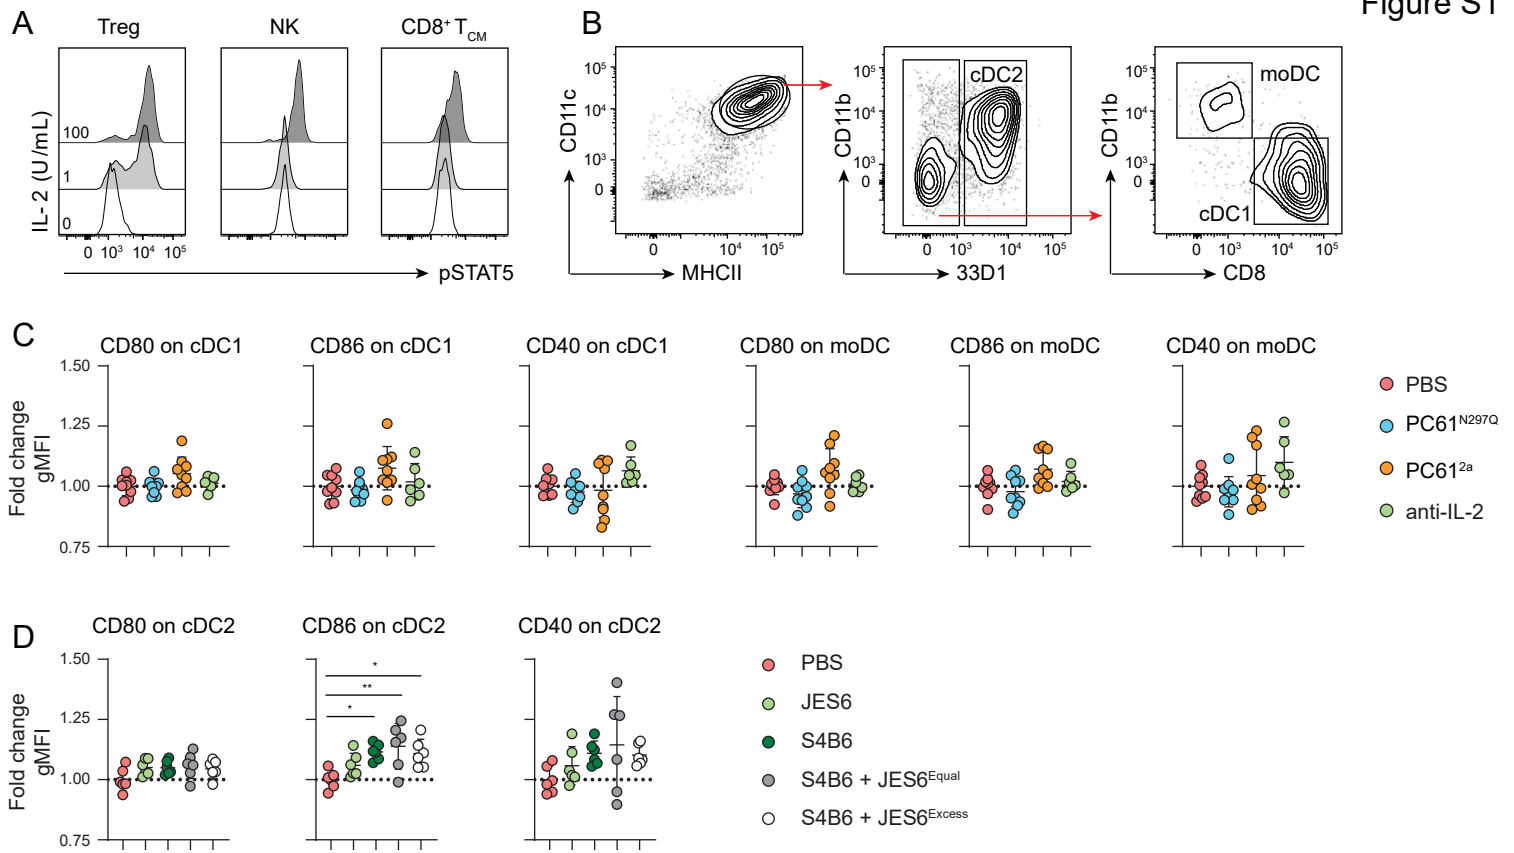

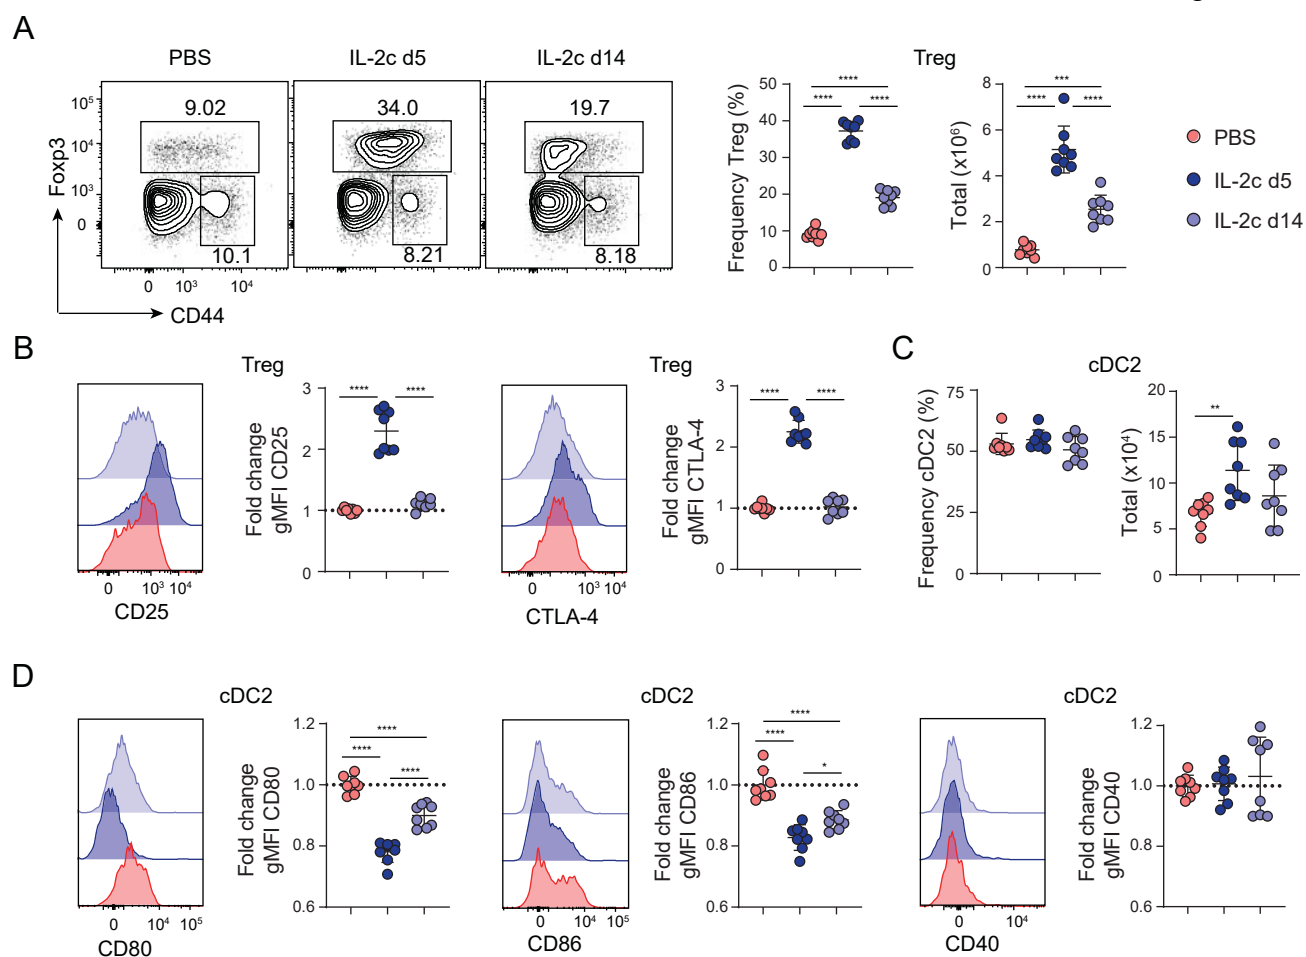

Figure S2.

WT B6 mice were treated IP with PBS or IL-2 complex (IL-2 and JES6) on day 0 and day 2, and sacrificed on day 5 or day 14 for analysis. (A) Representative flow cytometric analyses of Foxp3 and CD44 expression by gated splenic CD4<sup>+</sup> T cells. Foxp3<sup>+</sup> Treg cells are gated as indicated. Right, Graphical analysis of frequency and total number of splenic Treg cells in each treatment group. (B) Representative flow cytometry histograms of CD25 PC61 and CTLA-4 staining in Treg cells. Corresponding graphical analysis of fold change in gMFI over controls of CD25 PC61 and CTLA-4 staining by Treg cells in each treatment group. (C) Graphical analysis of frequency and total number of cDC2 in the spleen of each treatment group. (D) Representative flow cytometry histograms of CD80, CD86 and CD40 staining in cDC2. Corresponding graphical analysis of fold change in gMFI over controls of CD80, CD86 and CD40 staining by cDC2 in each treatment group. Data is combined from two independent experiments, 8 mice per group total. Significance determined by one-way ANOVA with Tukey post-test for multiple comparisons. \* $p < 0.05$ , \*\* $p < 0.01$ , \*\*\* $p < 0.001$ , \*\*\*\* $p < 0.0001$

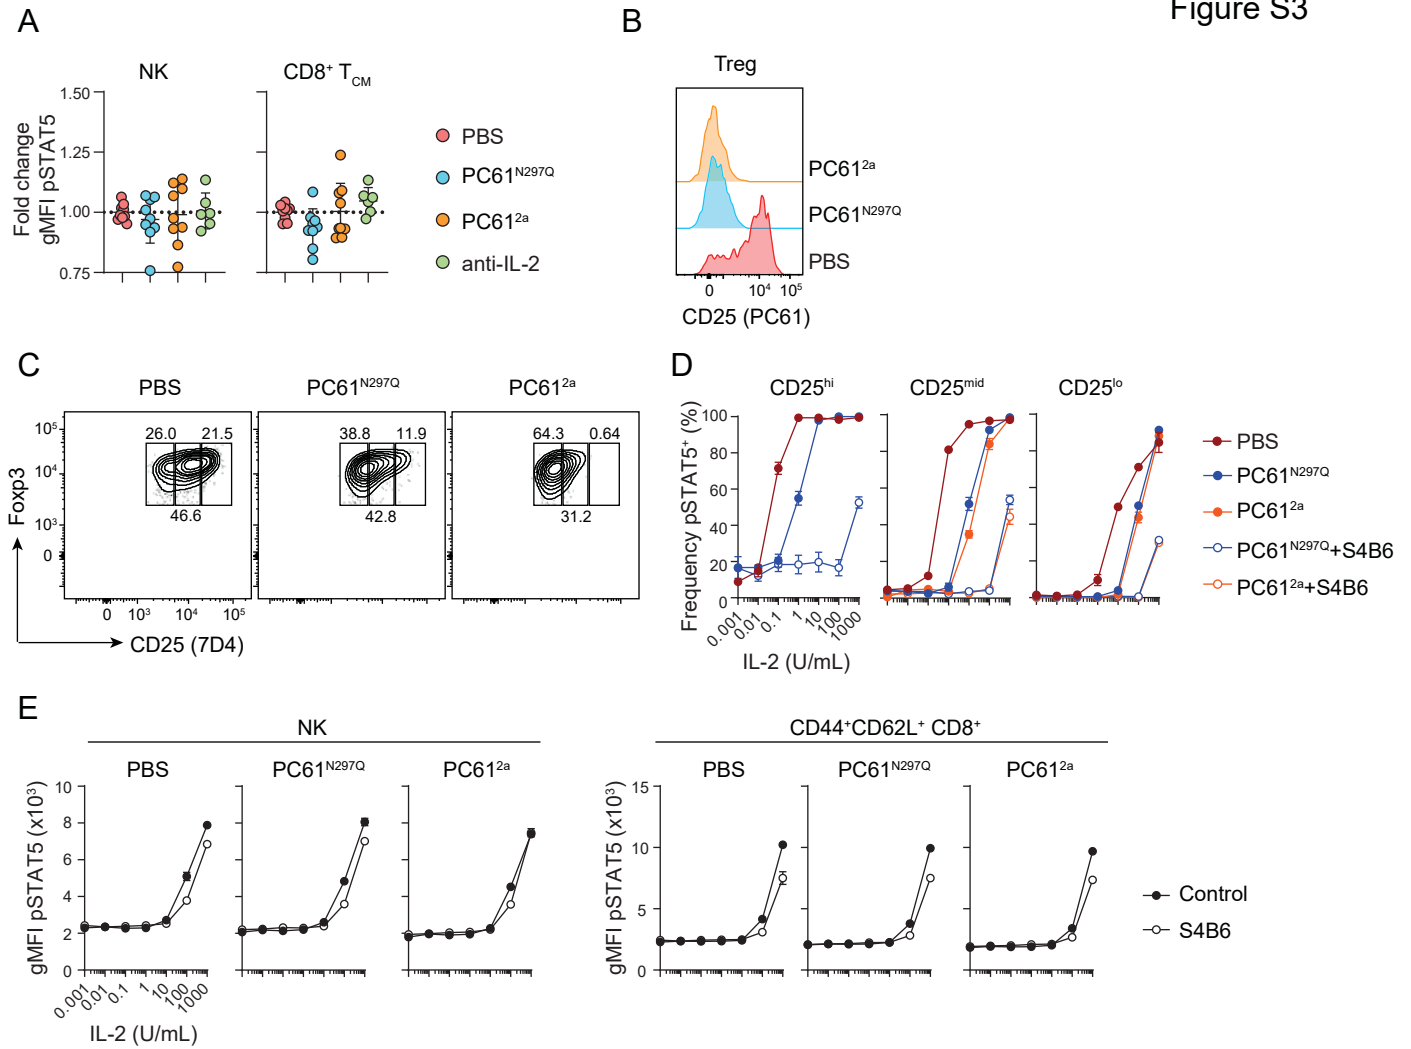

Figure S3.

(A) WT B6 mice were treated IP with PBS, PC61<sup>N297Q</sup>, PC61<sup>2a</sup>, or anti-IL-2 (JES6), and sacrificed after seven days for analysis. (A) Graphical analysis of fold change in gMFI over controls of pSTAT5 in NK and CD44<sup>+</sup>CD62L<sup>+</sup> CD8<sup>+</sup> cells in each treatment group. Data is combined from three independent experiments, 6-9 mice per group total. Significance determined by one-way ANOVA with Tukey post-test for multiple comparisons. \*p<0.05, \*\*p<0.01, \*\*\*p<0.001, \*\*\*\*p<0.0001. (B-E) WT B6 mice were treated IP with PBS, PC61<sup>N297Q</sup> or PC61<sup>2a</sup> and sacrificed after 24 hours. (B) Representative flow cytometry histograms of CD25 (PC61) staining on Treg cells. (C) Representative flow cytometry analysis of CD25 (7D4) staining on gated Treg cells, and gates defining CD25<sup>hi</sup>, CD25<sup>mid</sup> and CD25<sup>lo</sup> cells are shown. (D) Graphical analysis of frequency of pSTAT5<sup>+</sup> Treg cells in response to in vitro IL-2 +/- S4B6 in each in vivo treatment group (PBS, PC61<sup>N297Q</sup> or PC61<sup>2a</sup>) as indicated. (E) Graphical analysis of gMFI pSTAT5 NK or CD44<sup>+</sup>CD62L<sup>+</sup> CD8<sup>+</sup> cells in response to in vitro rIL-2 +/- S4B6 in each in vivo treatment group (PBS, PC61<sup>N297Q</sup> or PC61<sup>2a</sup>). Data is from one representative experiment, with three technical replicates per condition. Experiments were repeated independently at least three times.
